# Supplementary material for: The influence of differently functionalized nanodiamonds on proliferation, apoptosis and EMT/MET phenomena in 2D and 3D tumor cell cultures
Source: Royal Society of Chemistry journal article supplement (doi:10.1039/d1tb01739j), 2021-01-01
Supplement: d1tb01739j1.pdf [file d1tb01739j1.pdf]

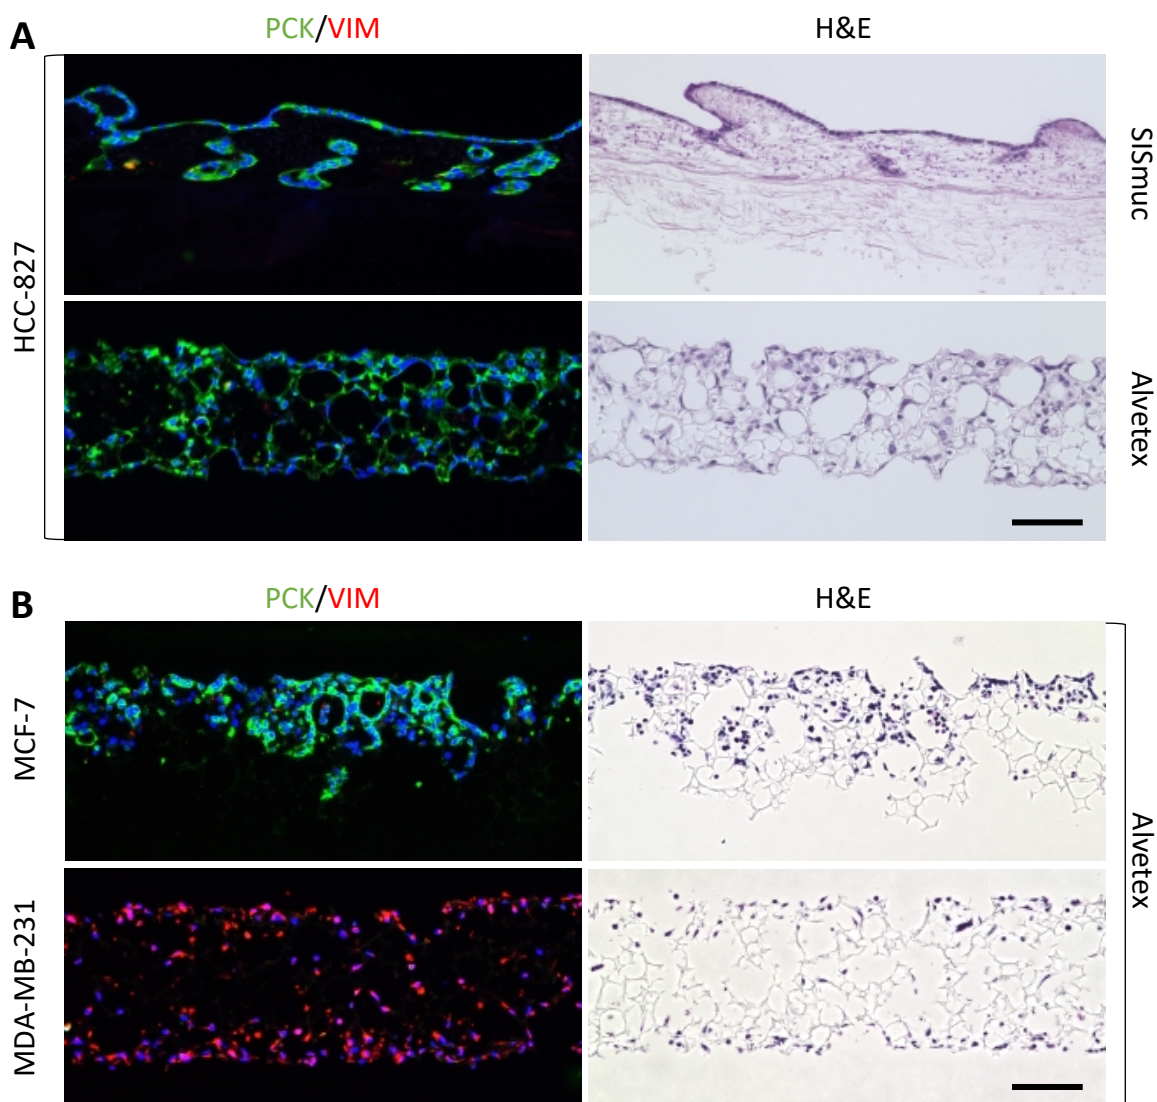

Figure S1: Microscopic images of cancer cells on 3D tumor models. Immunofluorescence staining of pan-cytokeratin (green), vimentin (red) and H&E staining of (A) HCC-827 cells cultured on SISmuc or Alvetex™ scaffolds and (B) MCF-7 and MDA-MB-231 cells on Alvetex™ scaffolds. Scale bar 100  $\mu\text{m}$ .
