# Supplementary material for: The influence of differently functionalized nanodiamonds on proliferation, apoptosis and EMT/MET phenomena in 2D and 3D tumor cell cultures
Source: Royal Society of Chemistry journal article supplement (doi:10.1039/d1tb01739j), 2021-01-01
Supplement: d1tb01739j2.pdf [file d1tb01739j2.pdf]

| LNCaP                               | ND-BA   | ND       | ND-BQ |
|-------------------------------------|---------|----------|-------|
| SNAI1                               | --      | --       | --    |
| VIM                                 | --      | --       | --    |
| Ki67                                | --      | --       | --    |
| p16                                 | --      | --       | --    |
| CDH1                                | --      | --       | --    |
| MDA MB 231                          | ND-BA   | ND       | ND-BQ |
| SNAI1                               | --      | --       | --    |
| VIM                                 | 0.683 * | 0.607 ** | --    |
| Ki67                                | --      | --       | --    |
| no p16 expression                   |         |          |       |
| no CDH1 expression                  |         |          |       |
| MCF-7                               | ND-BA   | ND       | ND-BQ |
| CDH1                                | --      | --       | --    |
| SNAI1                               | --      | --       | --    |
| Ki67                                | --      | --       | --    |
| no p16 expression                   |         |          |       |
| VIM - Ct values above optimal range |         |          |       |

Table S1: qPCR analysis of genes implicated in EMT, proliferation and apoptosis. \*P(H1)= 0.008

\*\*P(H1)= 0.004 -- No significant change. Statistical analysis was performed using Relative Expression Software Tool (REST) <sup>1</sup>. Number of randomizations: 2000

1. M. W. Pfaffl, G. W. Horgan and L. Dempfle, *Nucleic Acids Res*, 2002, **30**, e36.
